# Supplementary material for: Enzymatically triggered self-assembly of poly(ethylene glycol)-attached oligopeptides into well-organized nanofibers
Source: Royal Society of Chemistry journal article supplement (doi:10.1039/b611679e), 2006-01-01
Supplement: b611679e.pdf [file b611679e.pdf]

## **Supplemental Information**

### ***Enzymatically Triggered Self-assembly of Poly(ethylene glycol)-attached Oligopeptide into Well-organized Nanofibers***

*Tomoyuki Koga, Ken-ichi Kitamura, and Nobuyuki Higashi\**

#### **Experimental section**

##### **Materials.**

The poly(ethylene glycol)-attached  $\beta$ -sheet peptide having thrombin-cleavage site, L<sub>4</sub>K<sub>8</sub>L<sub>4</sub>-VPRGS-PEG (**1**), and its control peptide, L<sub>4</sub>K<sub>8</sub>L<sub>4</sub>-SGRPVL-PEG (**2**), were prepared from solid phase peptide synthesis using 9-fluorenylmethoxycarbonyl (Fmoc) chemistry. These peptides were synthesized on a TentaGel PAP (Papp Polymere), by using Fmoc-L-amino acid derivatives (3 equiv), 1-hydroxy-7-azabenzotriazole (3 equiv) and 1,3-diisopropylcarbodiimide (3 equiv) in *N,N*-dimethylformamide (DMF) for coupling, and piperidine (25%)/DMF for Fmoc removal. To cleave the peptide from the resin and remove the side chain protecting groups, the peptide-resin was treated with trifluoroacetic acid (TFA)/CH<sub>2</sub>Cl<sub>2</sub> (9/1 v/v). The peptides were identified by matrix-assisted laser desorption ionization-time of flight MS (MALDI-TOFMS) (Shimazu KOMPACT MALDI) and <sup>1</sup>H-NMR spectroscopy (400 MHz, JEOL FX-400) (Fig. S2). The peptides **1** and **2** were dissolved in 2,2,2-trifluoroethanol (TFE) as a stock solution before the aggregation assay. The aggregation solutions of the peptides (final peptide concentration: 40  $\mu$ M, TFE content: 5 %) were prepared by diluting the stock solution with the 5 mM Tris/HCl buffer. All the incubations for the aggregation of the peptides were performed at room temperature.

The reference peptide, L<sub>4</sub>K<sub>8</sub>L<sub>4</sub>-VPR, was also synthesized by solid phase peptide synthesis on a CREAR (cross-linked ethoxylate acrylate resin, PEPTIDE INSTITUTE, INC.) in a manner similar to that described above, and purified by reversed-phase HPLC (Bio-Rad, DuoFlow) on a YMC-Pack Pro C18 (20 x 150 mm) by using a linear gradient of water-acetonitrile (containing 0.1% TFA). MALDI-TOFMS: found [M+H]<sup>+</sup> (calcd. [M+H]<sup>+</sup>); L<sub>4</sub>K<sub>8</sub>L<sub>4</sub>-VPR: *m/z* 2303 (2302.1). The thrombin (from bovin plasma) was purchased from Nacalai Tesque, Inc. and used without further purification.

### ***Measurements.***

CD spectra were recorded on a J-720 spectropolarimeter (JASCO Ltd.) under a nitrogen atmosphere. Experiments were performed in a quartz cell with a 5 mm path length over the range of 190-250 nm at room temperature. The AFM images were collected at ambient temperature on a Nanoscope IIIa (Digital Instrument, Inc.) operated by tapping using a silicon tip (tip radius 5-10 nm). A 10  $\mu\text{m}$  x 10  $\mu\text{m}$  scanner was used for imaging. The scanning speed was at a line frequency of 1 Hz, and the original images were sampled at a resolution of 512 x 512 points.

### ***Thrombin-cleavage Study.***

The poly(ethylene glycol)-attached peptide containing an enzyme-cleavage site was digested by thrombin under the following conditions. The peptide **1** (40  $\mu\text{M}$ ) was first dissolved in 1.5 mL of Tris/HCl buffer (5 mM, pH 9.0, 5% TFE), and then 15  $\mu\text{L}$  of thrombin aqueous solution (0.8 NIH unit) was injected into the **1**-solution. Reaction mixture was incubated at room temperature for 30 min and the resulting solution was analyzed by MALDI-TOF MS spectroscopy (Fig. 1). Matrix: 2, 5-Dihydroxy benzoic acid.

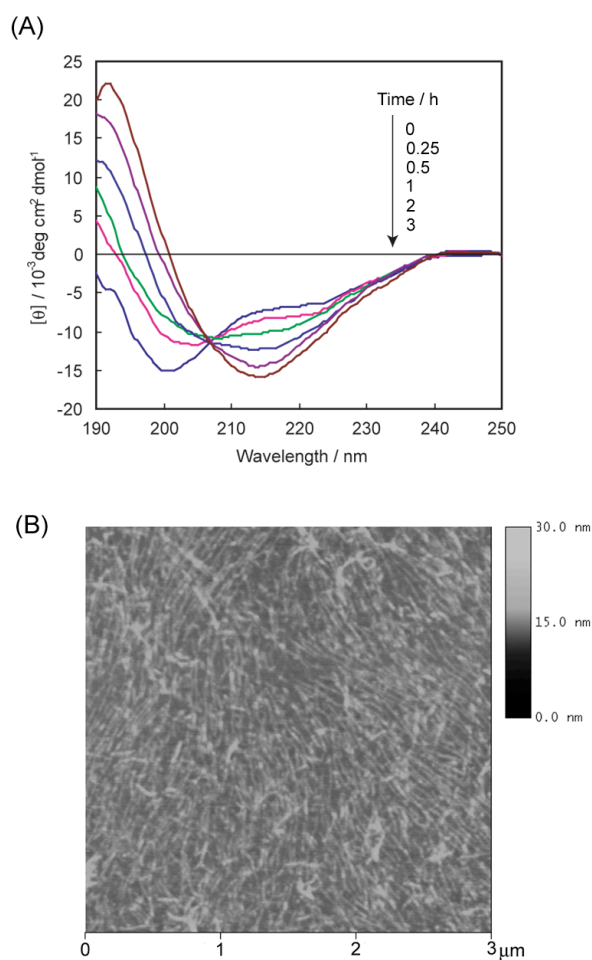

**Fig. S1.** (A) Time dependence of CD spectra for the independently and chemically synthesized **L<sub>4</sub>K<sub>8</sub>L<sub>4</sub>-VPR** in Tris buffer at pH 9.0 (containing 5% TFE). The peptide was incubated at room temperature for the time indicated (0-3 h). [**L<sub>4</sub>K<sub>8</sub>L<sub>4</sub>-VPR**] = 40  $\mu$ M. (B) Tapping-mode AFM image (3  $\mu$ m x 3  $\mu$ m) of **L<sub>4</sub>K<sub>8</sub>L<sub>4</sub>-VPR** at 24 h, pH 9.0. z-scale: 30 nm.

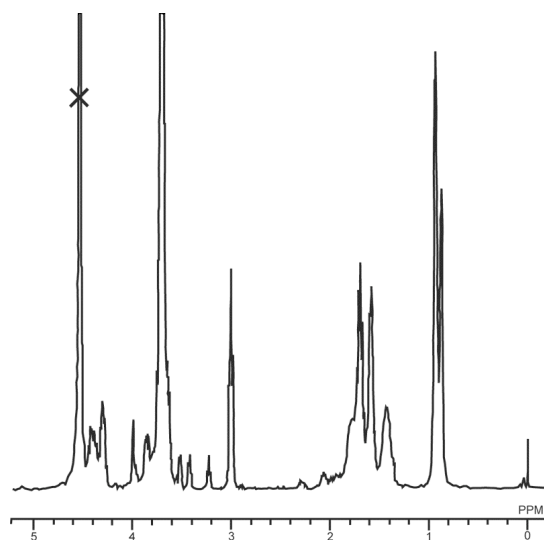

**Fig. S2.**  $^1\text{H}$ -NMR spectrum of **1** in  $\text{D}_2\text{O}$ .
